# Supplementary material for: N,N-Dimethylformamide-stabilized palladium nanoclusters as a catalyst for Larock indole synthesis
Source: Royal Society of Chemistry journal article supplement (doi:10.1039/c8ra01410h), 2018-01-01

Electronic Supplementary information

***N,N*-Dimethylformamide-stabilized palladium nanoclusters  
as catalyst for Larock indole synthesis**

Kaito Onishi,<sup>a</sup> Kei Oikawa,<sup>a</sup> Hiroki Yano,<sup>a</sup> Takeyuki Suzuki,<sup>b</sup> and Yasushi Obora<sup>\* a</sup>

<sup>a</sup> *Department of Chemistry and Materials Engineering, Faculty of Chemistry,*

*Materials and Bioengineering, Kansai University, Suita, Osaka 564-8680, Japan*

<sup>b</sup> *Comprehensive Analysis Center, The Institute of Scientific and Industrial Research (ISIR), Osaka*

*University, 8-1 Mihogaoka, Ibaraki, Osaka 567-0057, Japan*

E-mail: [obora@kansai-u.ac.jp](mailto:obora@kansai-u.ac.jp)

**Table of Contents**

|           |                                                                                                                                           |
|-----------|-------------------------------------------------------------------------------------------------------------------------------------------|
| S2:       | Fig. S1. IR spectrum of DMF molecules (a) and Pd NCs (b)                                                                                  |
| S3:       | Table S1. Concentration of Na, K, and Pd analyzed by ICP                                                                                  |
| S4:       | Fig. S2. ICP Peak profile of Na (black curve)                                                                                             |
| S5:       | Fig. S3. ICP Peak profile of K (black curve)                                                                                              |
| S6:       | Fig. S4. ICP Peak profile of Pd (black curve)                                                                                             |
| S7:       | Fig. S5. Transmission electron microscopy images (TEM image) of aggregated Pd NCs and EDS                                                 |
| S8:       | Fig. S6. TEM image of Pd NCs after the reaction<br>Fig. S7. EDS of Figs. 3 (a) and S6                                                     |
| S9:       | Fig. S8. Dynamic light scattering intensity of Pd NCs.<br>Fig. S9. Multiple catalyst-recycling. Conditions: as given in entry 14, Table 1 |
| S10:      | Table S2. Concentration of Pd analyzed by ICP in the hexane/ ethyl acetate phase                                                          |
| S11:      | Fig. S10. Peak profile of Pd in the hexane/ ethyl acetate phase                                                                           |
| S12:      | Fig. S11. A Plausible Catalytic Cycle<br>Fig. S12. IR spectrum of (a) Pd NCs before the reaction; (b) Pd NCs after the reaction.          |
| Reference |                                                                                                                                           |
| S13:      | Copies of <sup>1</sup> H (400 MHz, CDCl <sub>3</sub> ) and <sup>13</sup> C NMR spectra for <b>3a</b> .                                    |
| S14:      | Copies of <sup>1</sup> H (400 MHz, CDCl <sub>3</sub> ) and <sup>13</sup> C NMR spectra for <b>3b</b> .                                    |
| S15:      | Copies of <sup>1</sup> H (400 MHz, CDCl <sub>3</sub> ) and <sup>13</sup> C NMR spectra for <b>3c</b> .                                    |
| S16:      | Copies of <sup>1</sup> H (400 MHz, CDCl <sub>3</sub> ) and <sup>13</sup> C NMR spectra for <b>3d</b> .                                    |
| S17:      | Copies of <sup>1</sup> H (400 MHz, CDCl <sub>3</sub> ) and <sup>13</sup> C NMR spectra for <b>3e</b> .                                    |
| S18:      | Copies of <sup>1</sup> H (400 MHz, CDCl <sub>3</sub> ) and <sup>13</sup> C NMR spectra for <b>3f and 3f'</b> .                            |
| S20:      | Copies of <sup>1</sup> H (400 MHz, CDCl <sub>3</sub> ) and <sup>13</sup> C NMR spectra for <b>3g</b> .                                    |

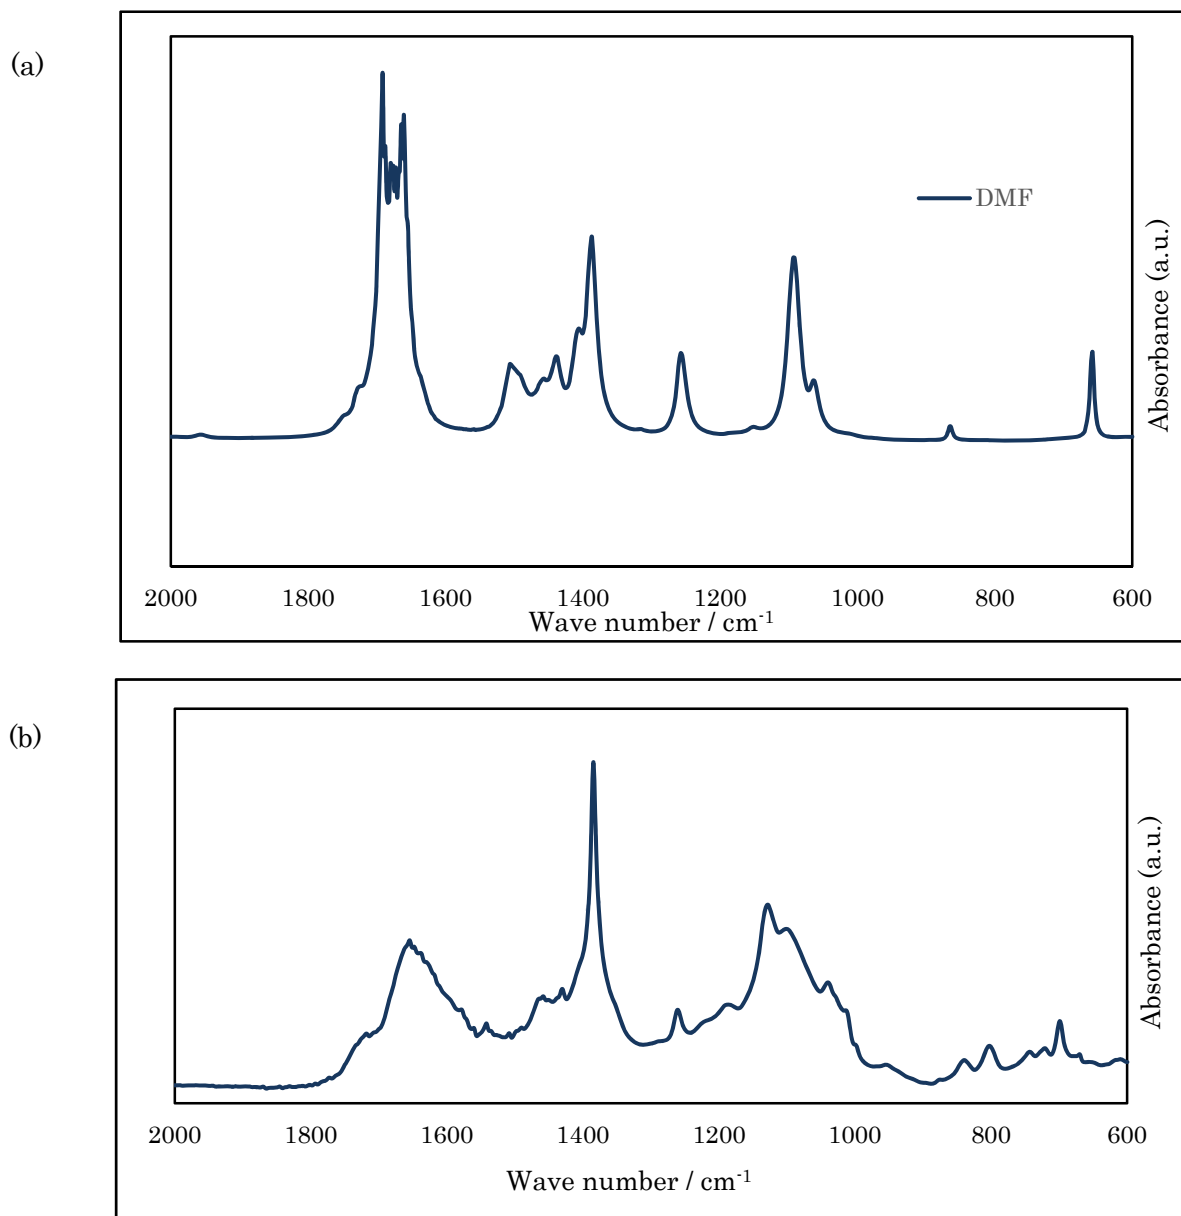

**Fig. S1.** IR spectra of DMF molecules (a) and Pd NCs (b)

**Table S1.** Concentration of Na, K, and Pd analyzed by ICP

| <intensity>     |            |            |            |
|-----------------|------------|------------|------------|
| element         | Na         | K          | Pd         |
| wave number     | 589.592 nm | 766.491 nm | 340.458 nm |
| Run 1           | 0.105796   | 0.000007   | 0.632416   |
| Run 2           | 0.105259   | -1.6E-05   | 0.626861   |
| Run 3           | 0.10616    | 0.000037   | 0.636318   |
| average         | 0.105738   | .000009R   | 0.631865   |
| R               | 0.000901   | 0.000053   | 0.009456   |
| SD              | 0.000453   | 0.000026   | 0.004752   |
| RSD             | 0.428757   | 281.036    | 0.752102   |
| <concentration> |            |            |            |
| element         | Na         | K          | Pd         |
| wave number     | 589.592 nm | 766.491 nm | 340.458 nm |
| unit            | ppm        | ppm        | Ppm        |
| Run 1           | 2.7186     | 0          | 3.38199    |
| Run 2           | 2.70314    | 0          | 3.34839    |
| Run 3           | 2.72911    | 0.004297   | 3.40559    |
| average         | 2.71695    | 0.001432   | 3.37866    |
| R               | 0.025975   | 0.004297   | 0.057195   |
| SD              | 0.013066   | 0.002481   | 0.028743   |
| RSD             | 0.480909   | 173.205    | 0.850715   |

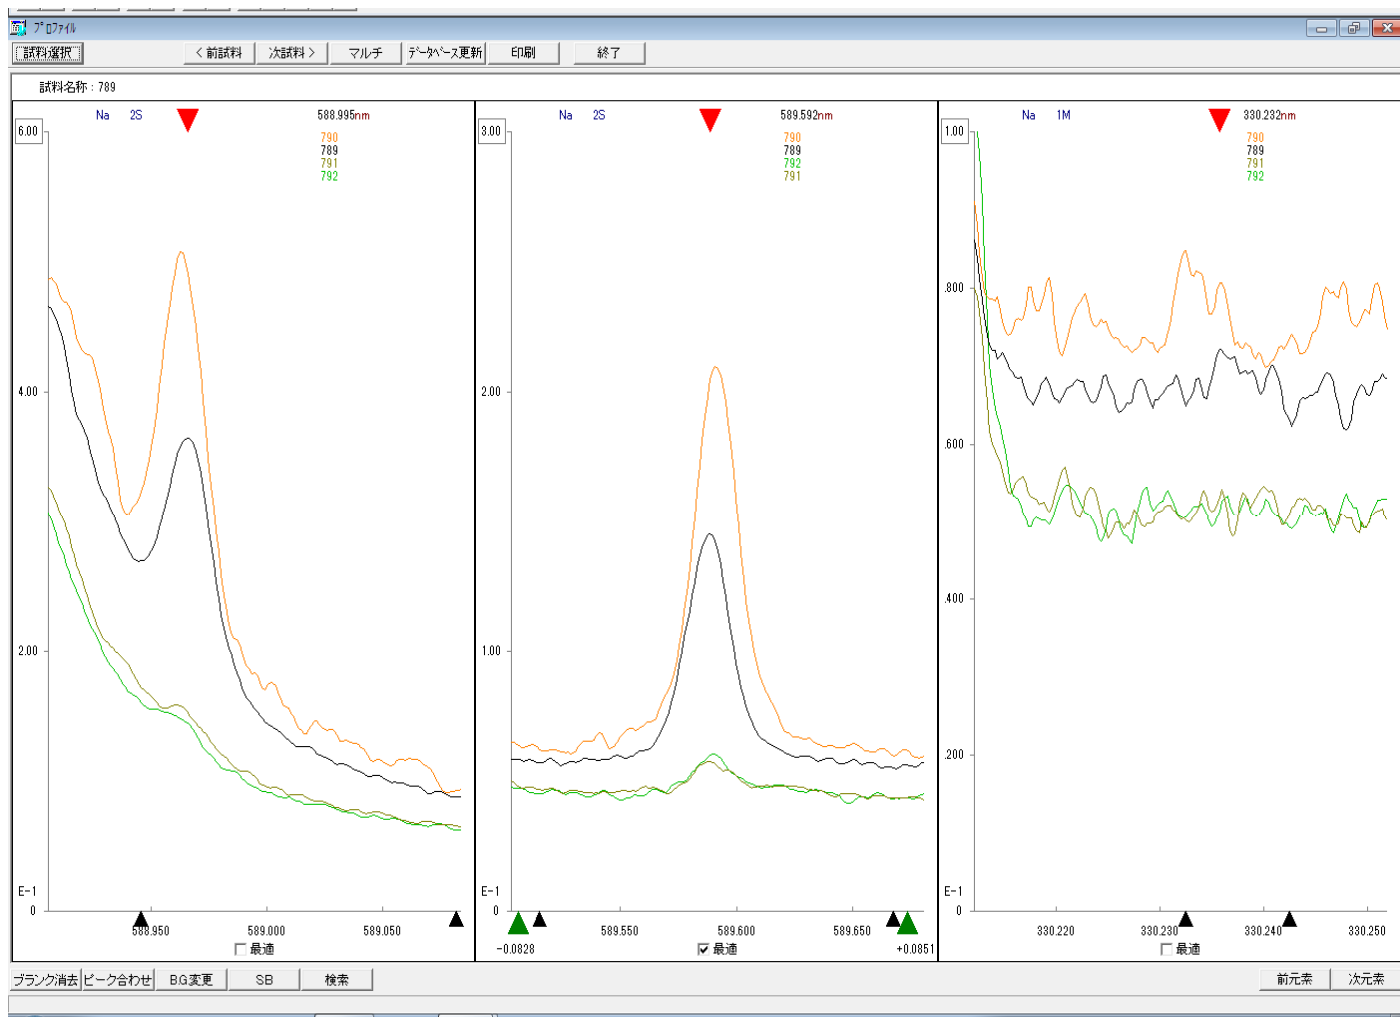

Fig. S2. Peak profile of Na (black curve)

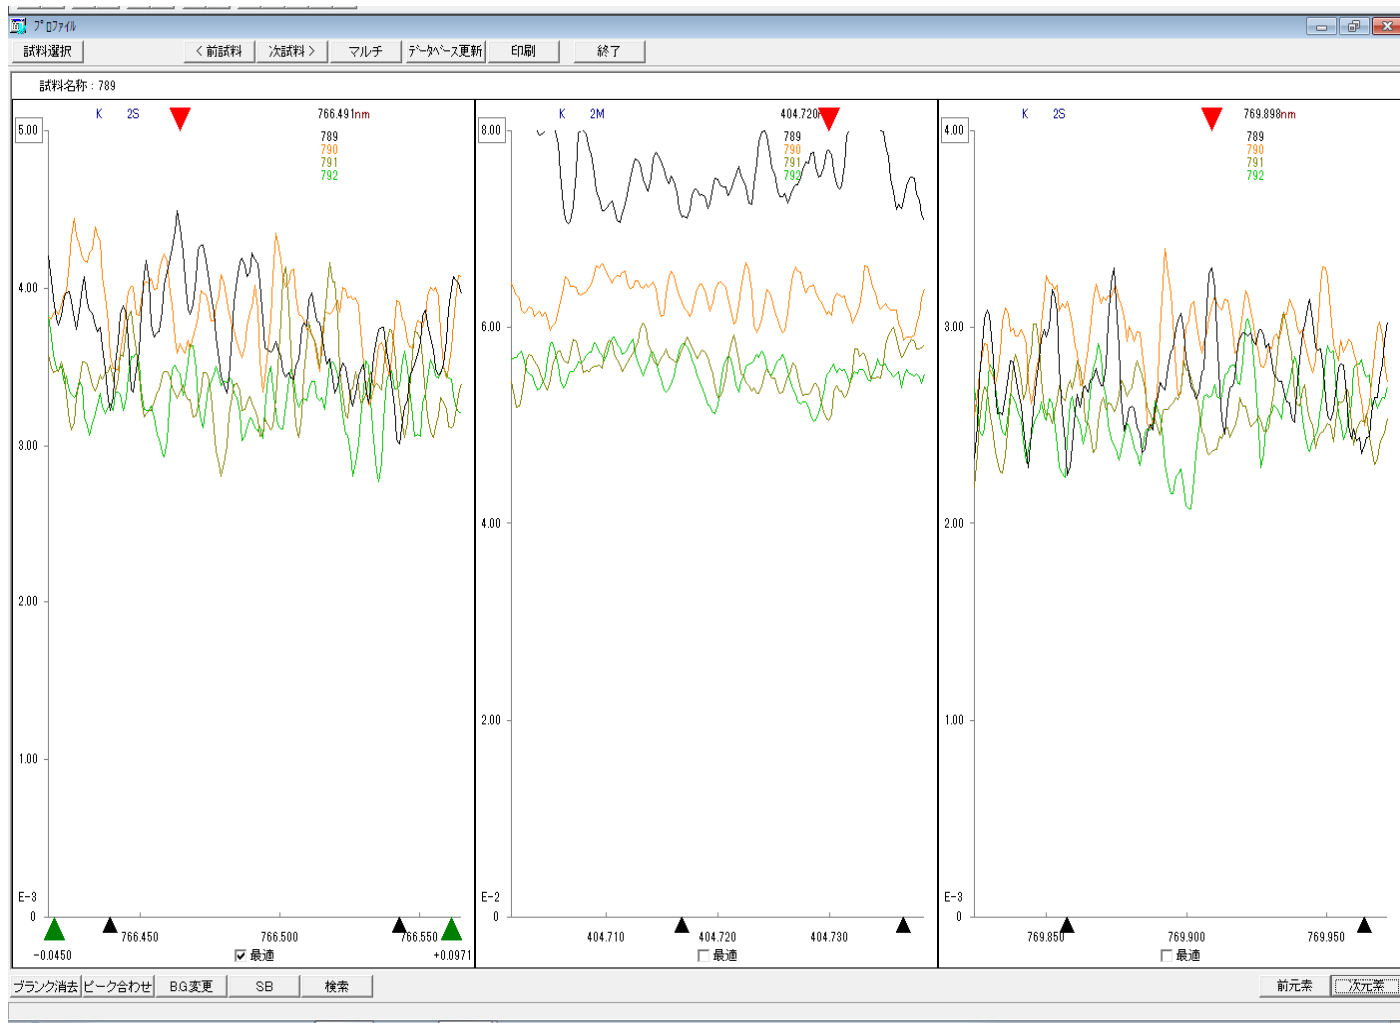

Fig. S3. Peak profile of K (black curve)

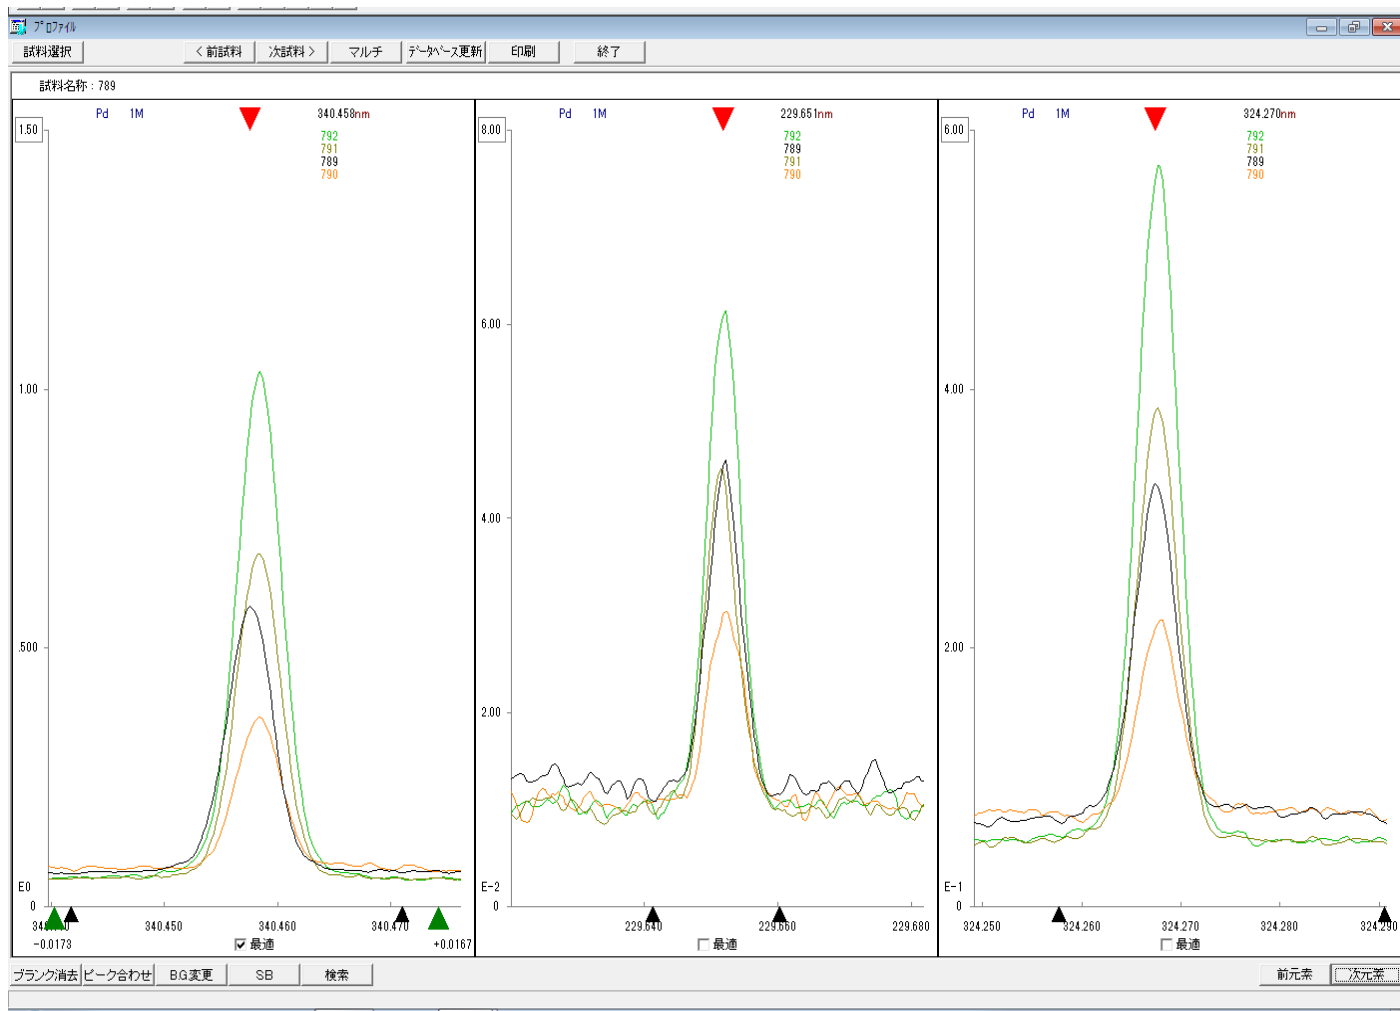

Fig. S4. Peak profile of Pd (black curve)

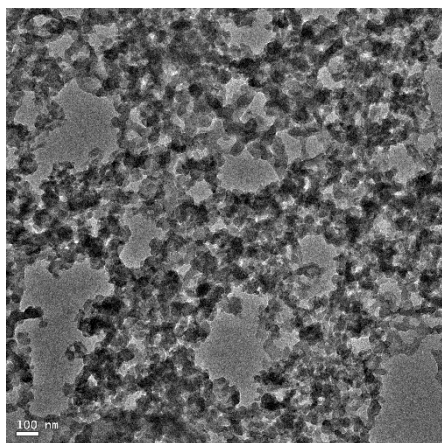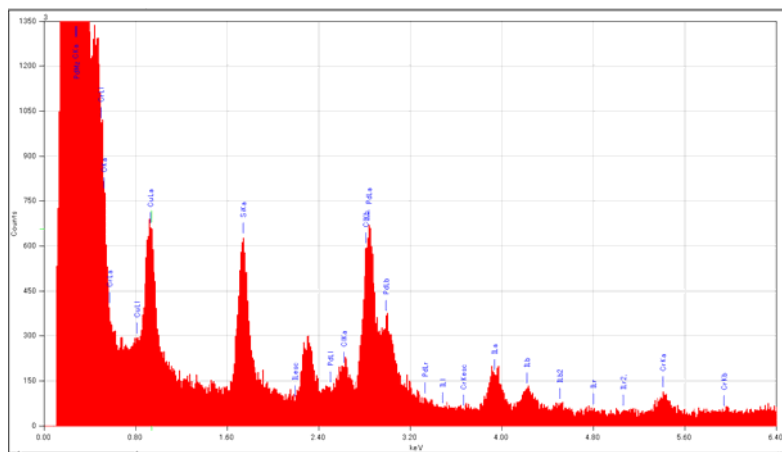

**Fig. S5.** (a) Aggregated Pd NCs in TEM image (scale bar = 100 nm), (b) Pd peak analyzed by EDS

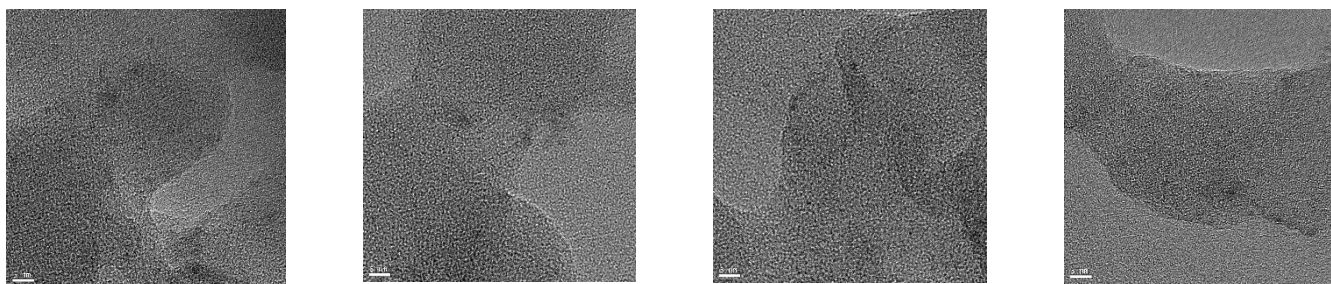

**Fig. S6.** Transmission electron microscopy images (TEM image) of Pd NCs after the reaction under the conditions entry 14 of Table 1 (scale bar = 5 nm). Particle size distribution of the nanoparticles after the reaction under the conditions entry 14 of Table 1 (Fig. 3. (b)) was used TEM images of Fig. S6 and Fig.3.

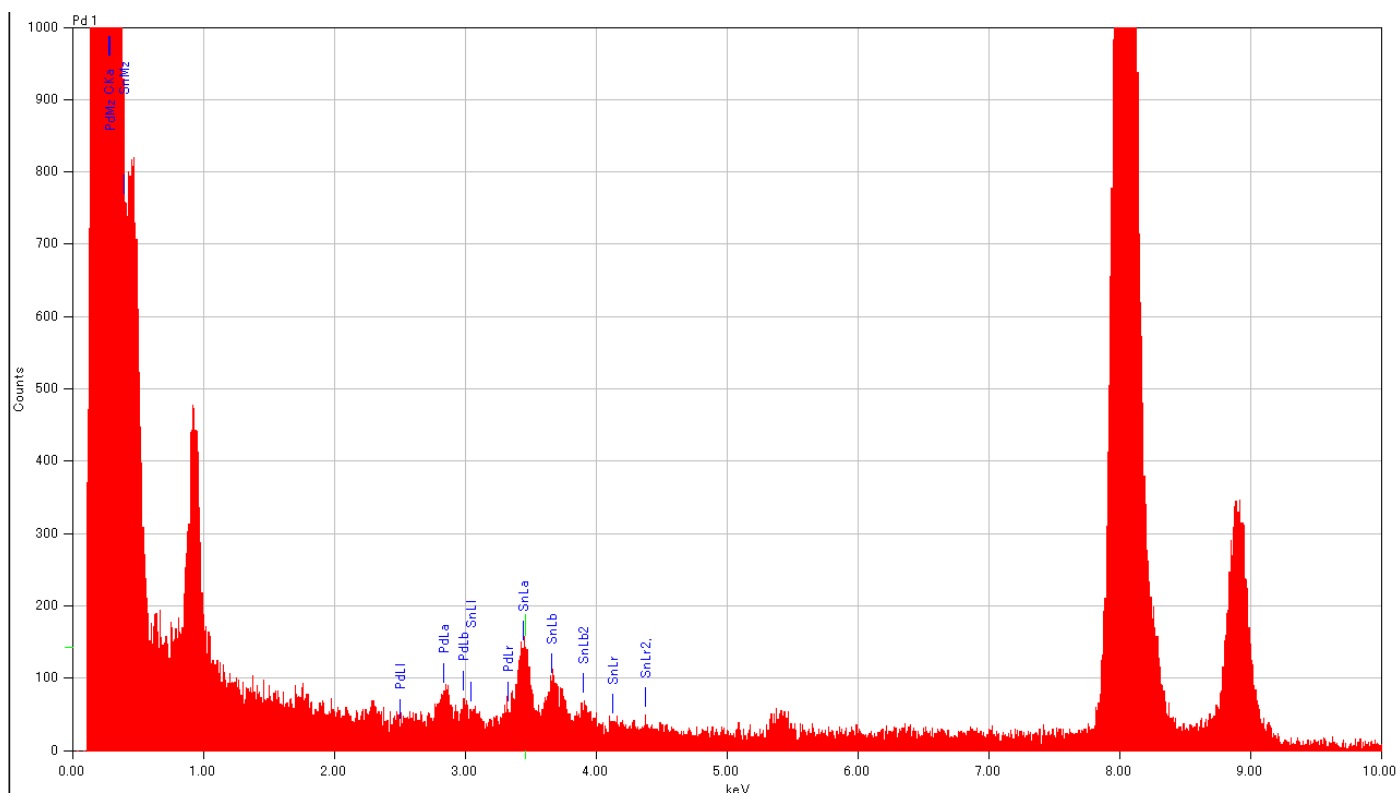

**Fig. S7.** EDS spectral of Figs. 3(a) and S6



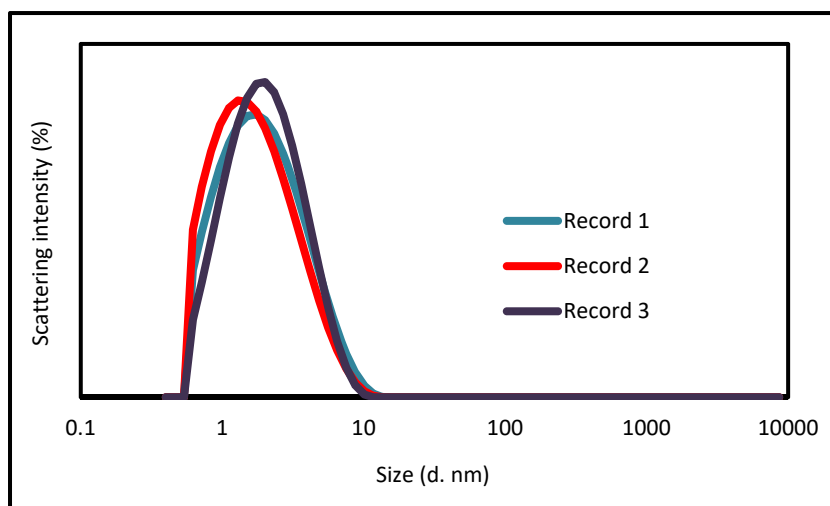

**Fig. S8.** Dynamic light scattering intensity of Pd NCs. Average Pd NCs size was 2.3 nm.

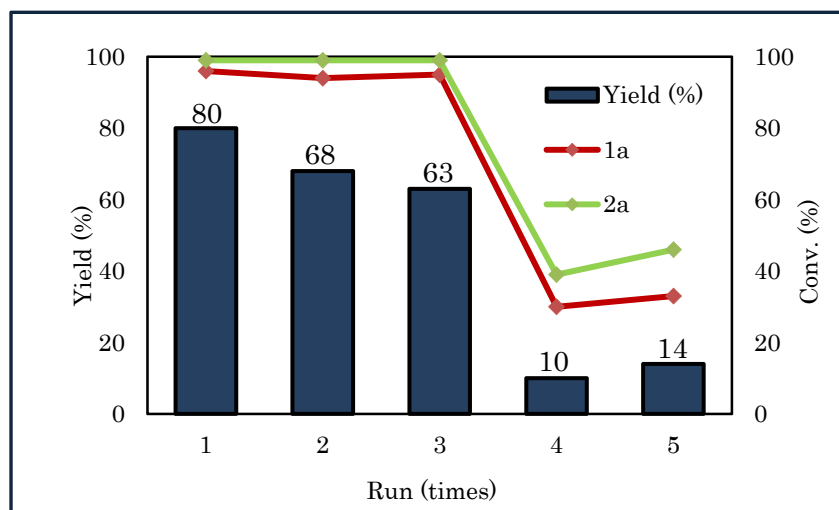

**Fig. S9.** Catalyst-recycling. Conditions as given in entry 14, Table 1

**Table S2.** Concentration of Pd analyzed by ICP in the hexane/ ethyl acetate phase

| <Intensity>     |           |
|-----------------|-----------|
| Element         | Pd        |
| Wavenumber      | 340.458nm |
| Run 1           | 1.44989   |
| Run 2           | 1.43035   |
| Run 3           | 1.44245   |
| Average         | 1.4409    |
| R               | 0.019542  |
| SD              | 0.009863  |
| RSD             | 0.684483  |
| <concentration> |           |
| Element         | Pd        |
| Wavenumber      | 340.458nm |
| Unit            | ppm       |
| Run 1           | 6.24719   |
| Run 2           | 6.15821   |
| Run 3           | 6.21328   |
| Average         | 6.20623   |
| R               | 0.088986  |
| SD              | 0.044911  |
| RSD             | 0.723636  |

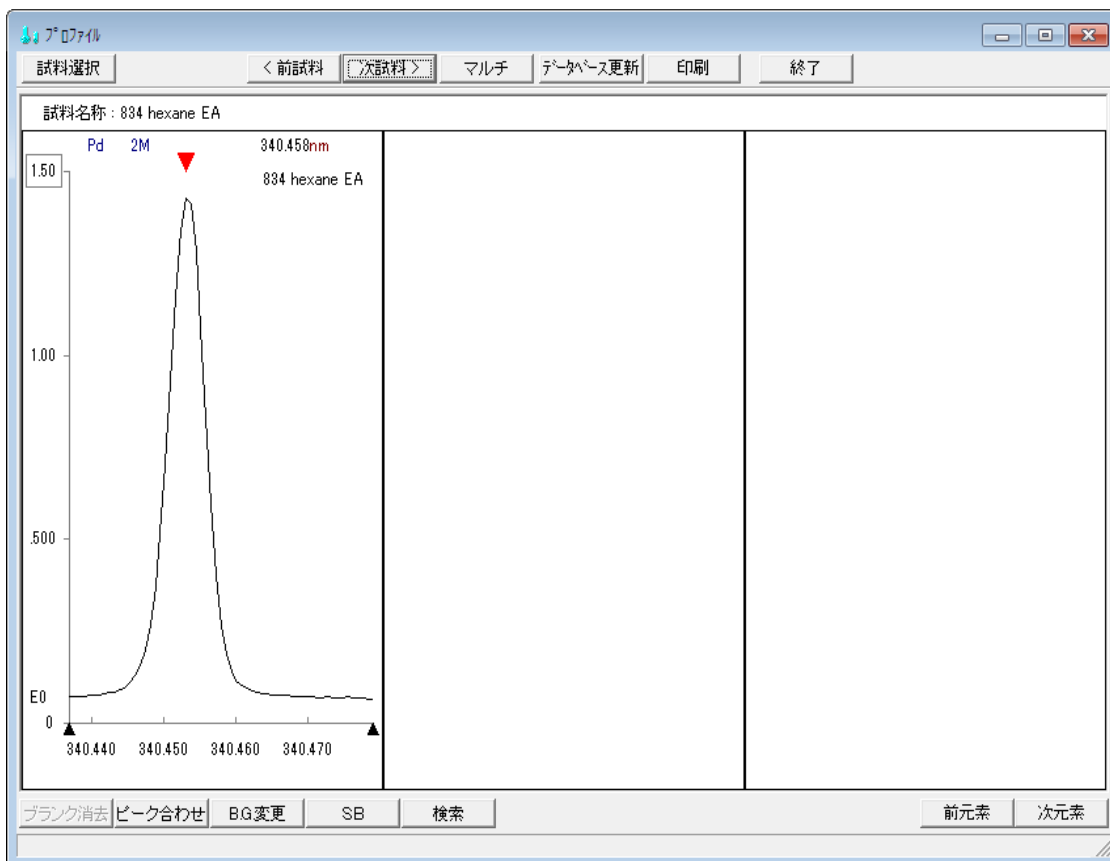

**Fig. S10.** Peak profile of Pd in the hexane/ ethyl acetate phase

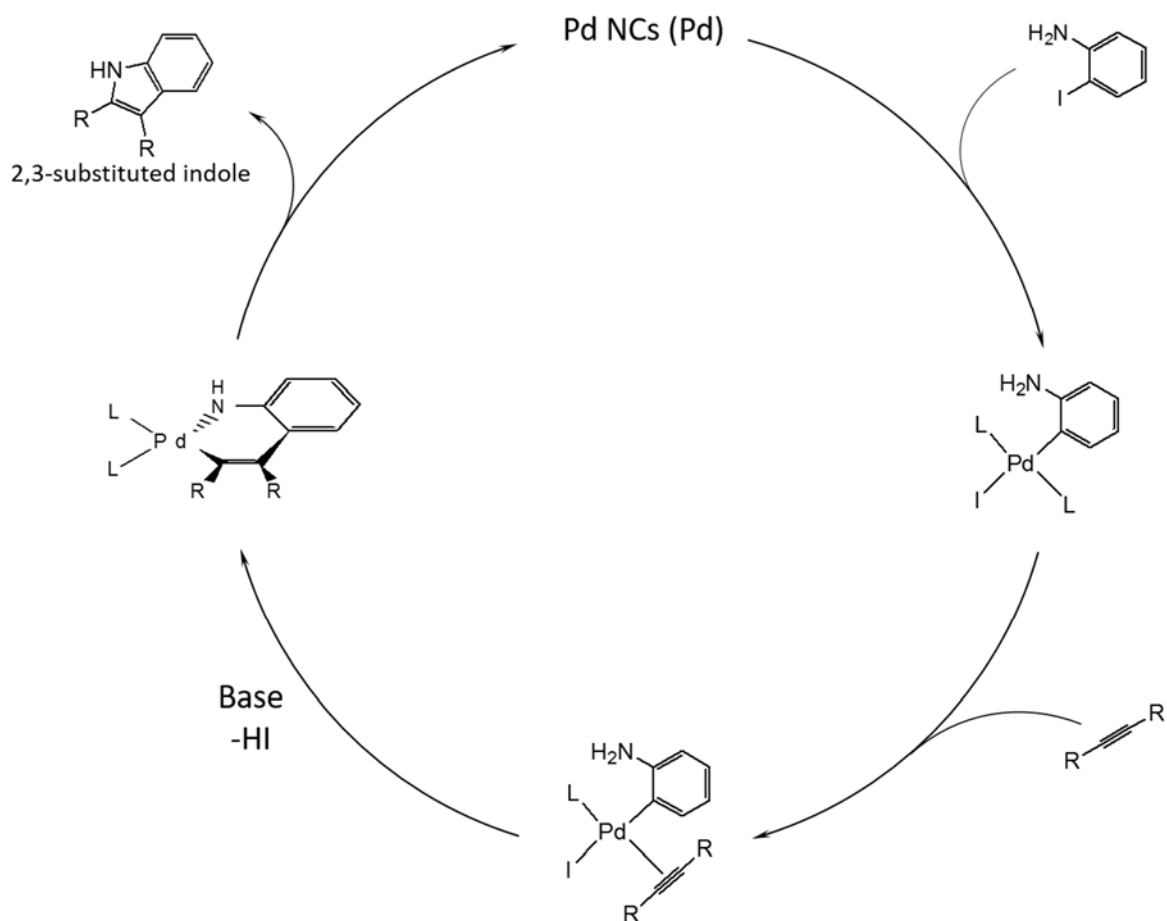

**Fig. S11.** A Plausible Catalytic Cycle of Larock Indole Synthesis Catalyzed by Pd NCs<sup>1</sup>

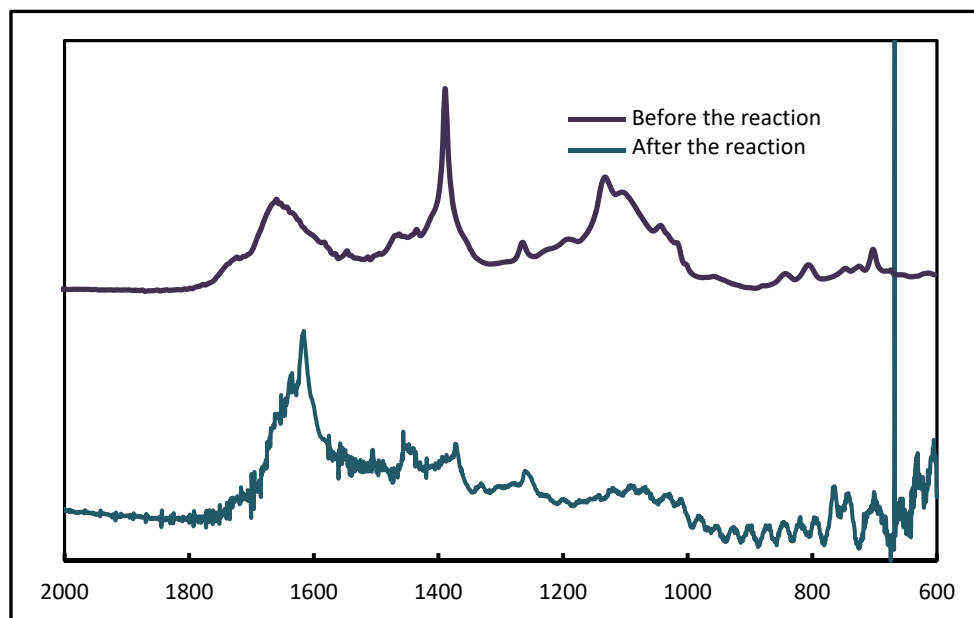

**Fig. S12.** IR spectrum of (a) Pd NCs before the reaction; (b) Pd NCs after the reaction.

## Reference

- (1) R. C. Larock, E. K. Yum and M. D. Refvik, *J. Org. Chem.*, 1998, **63**, 7652-7662.



3b

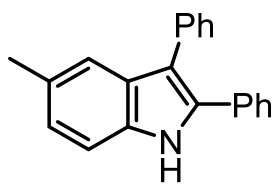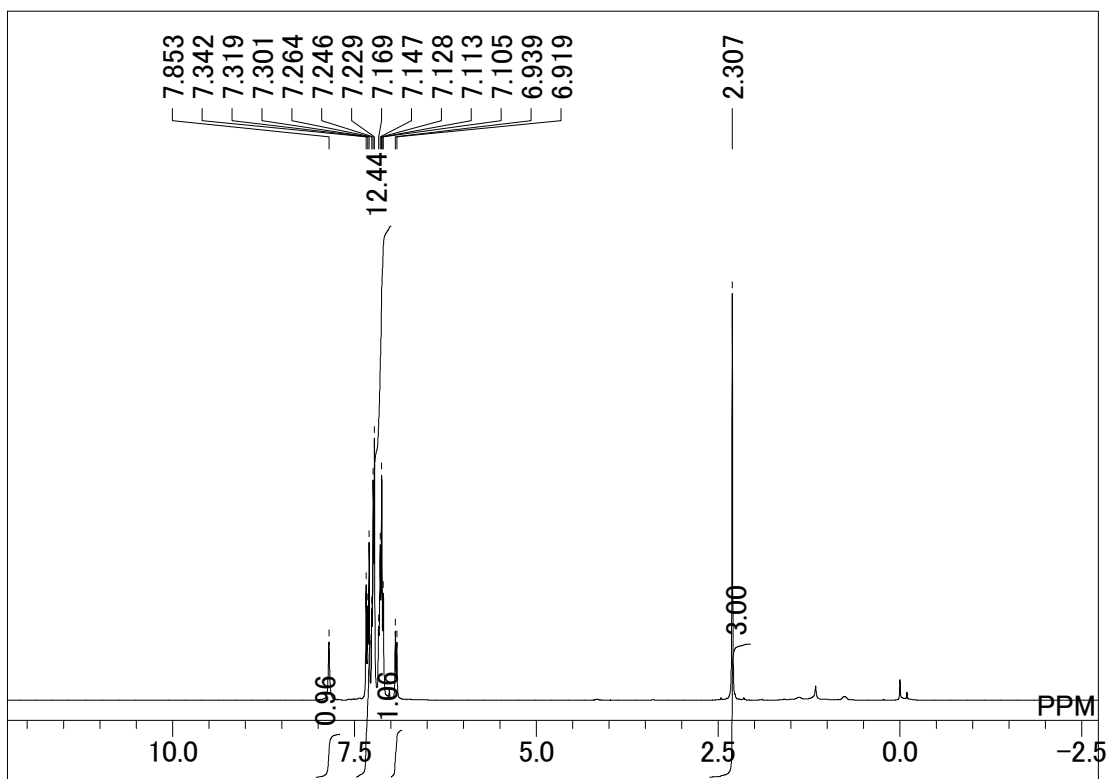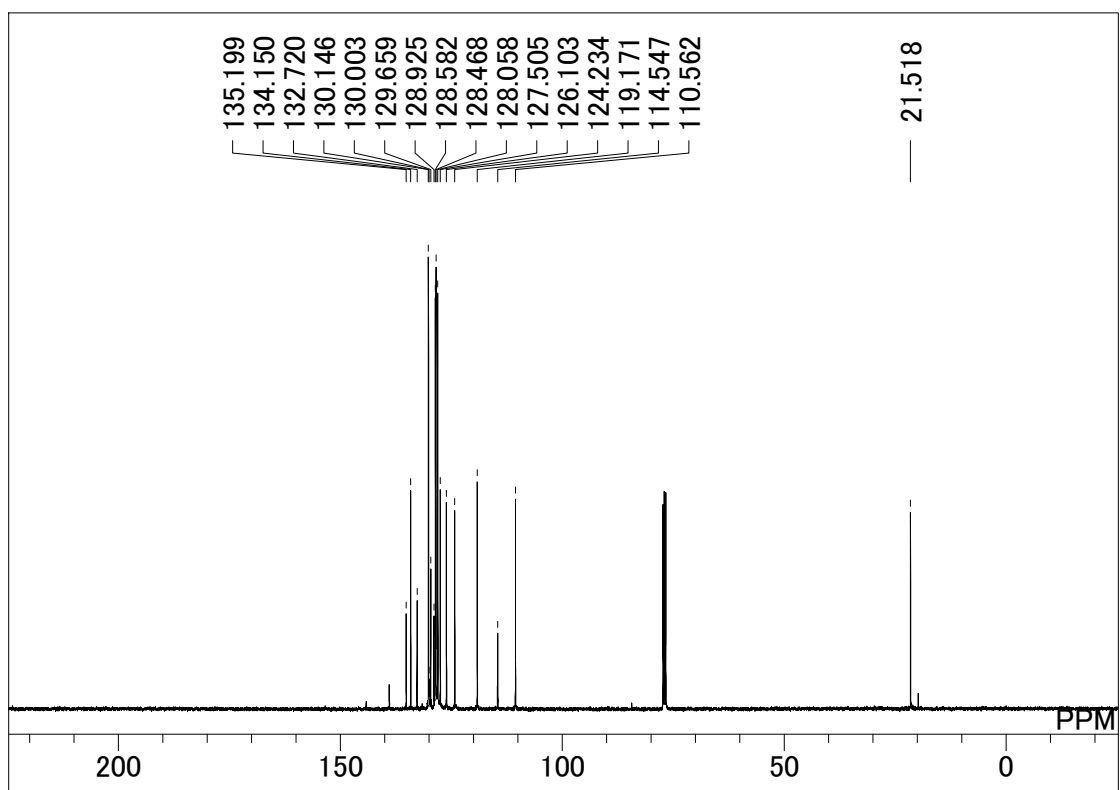

3c

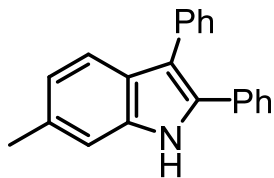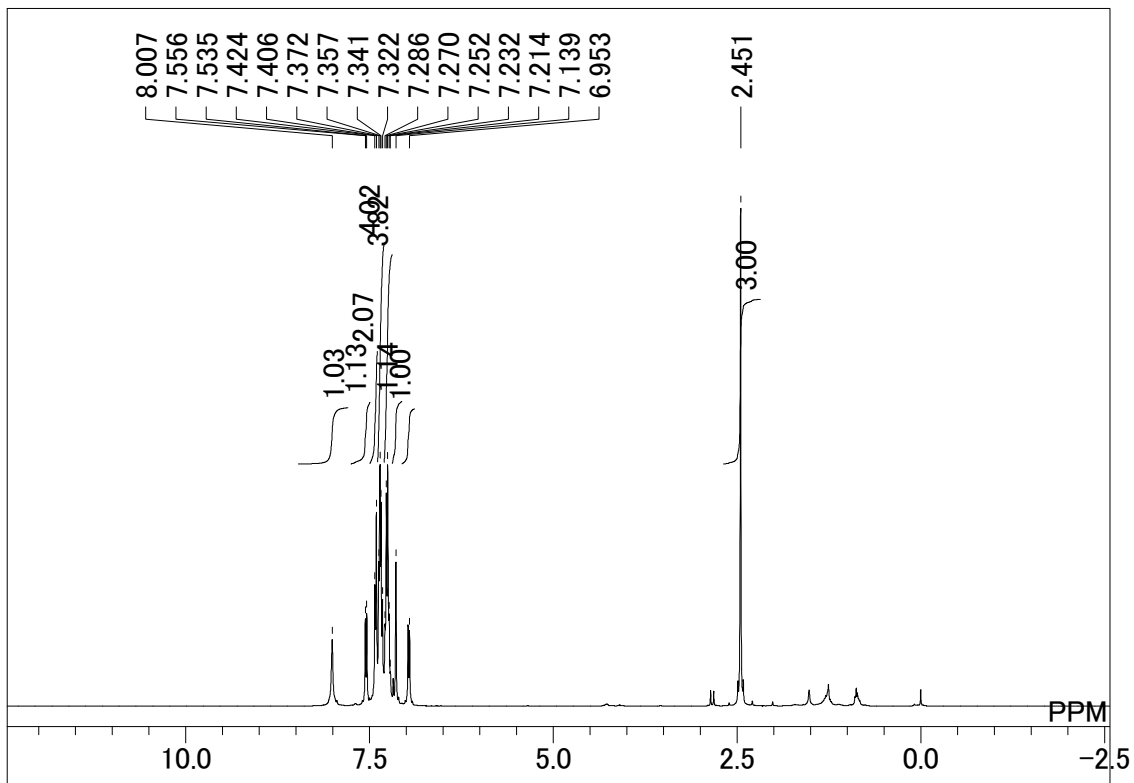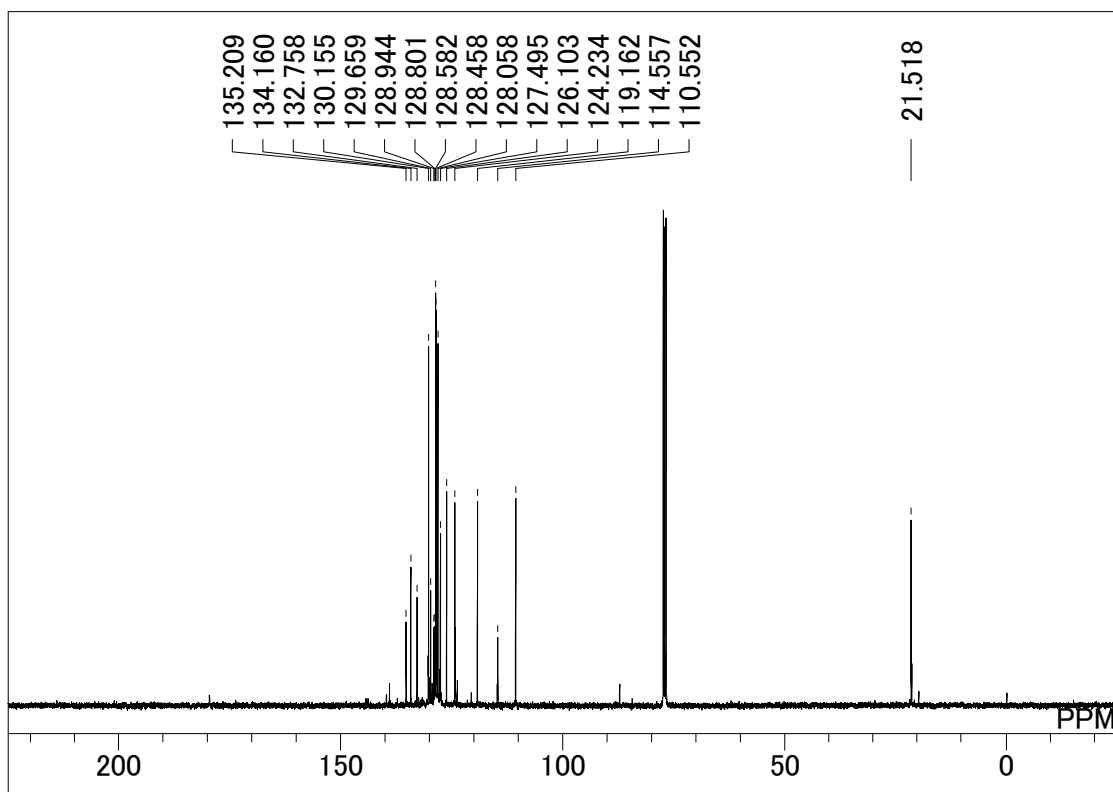

3d

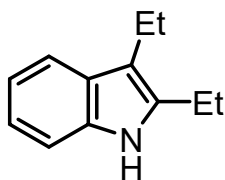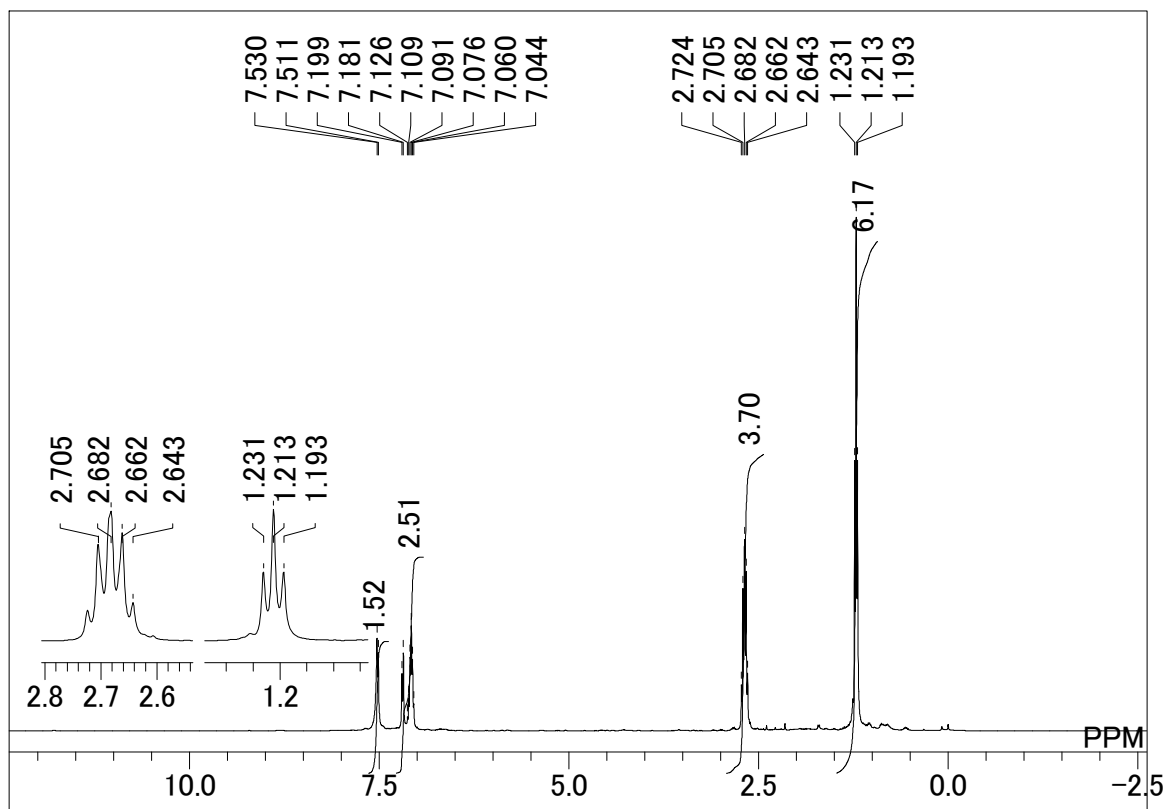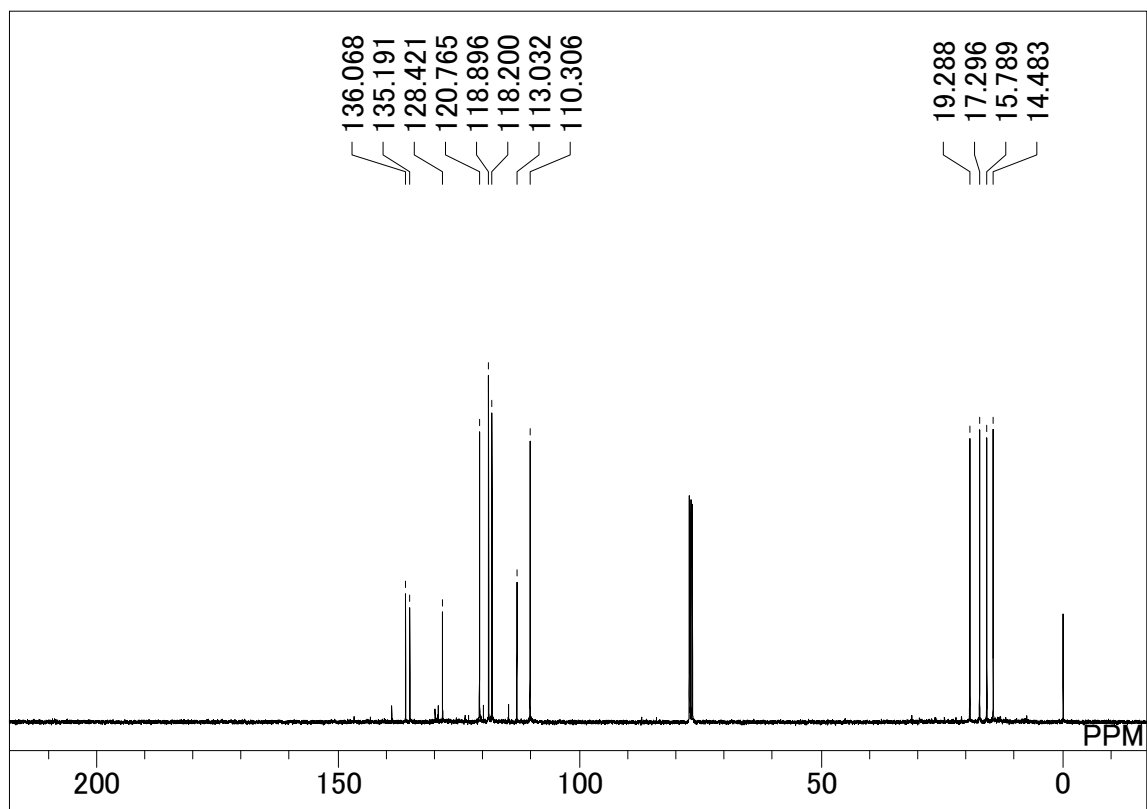



3e

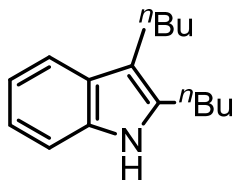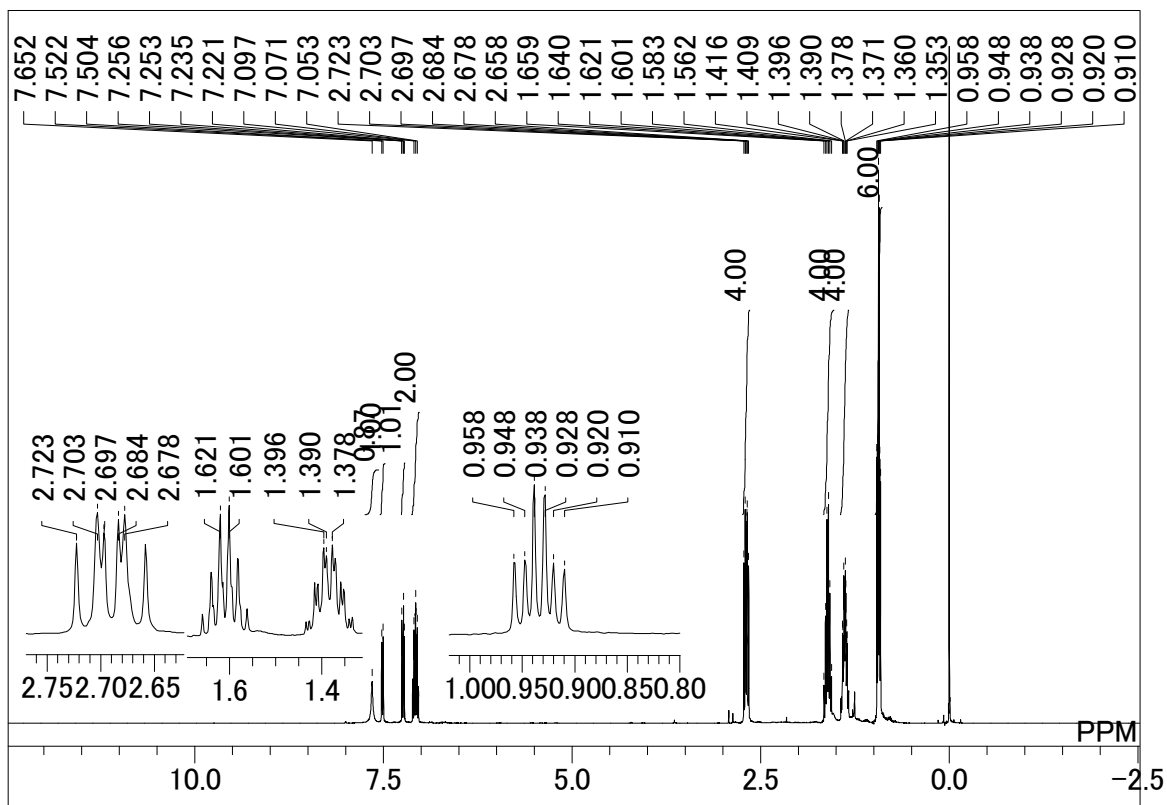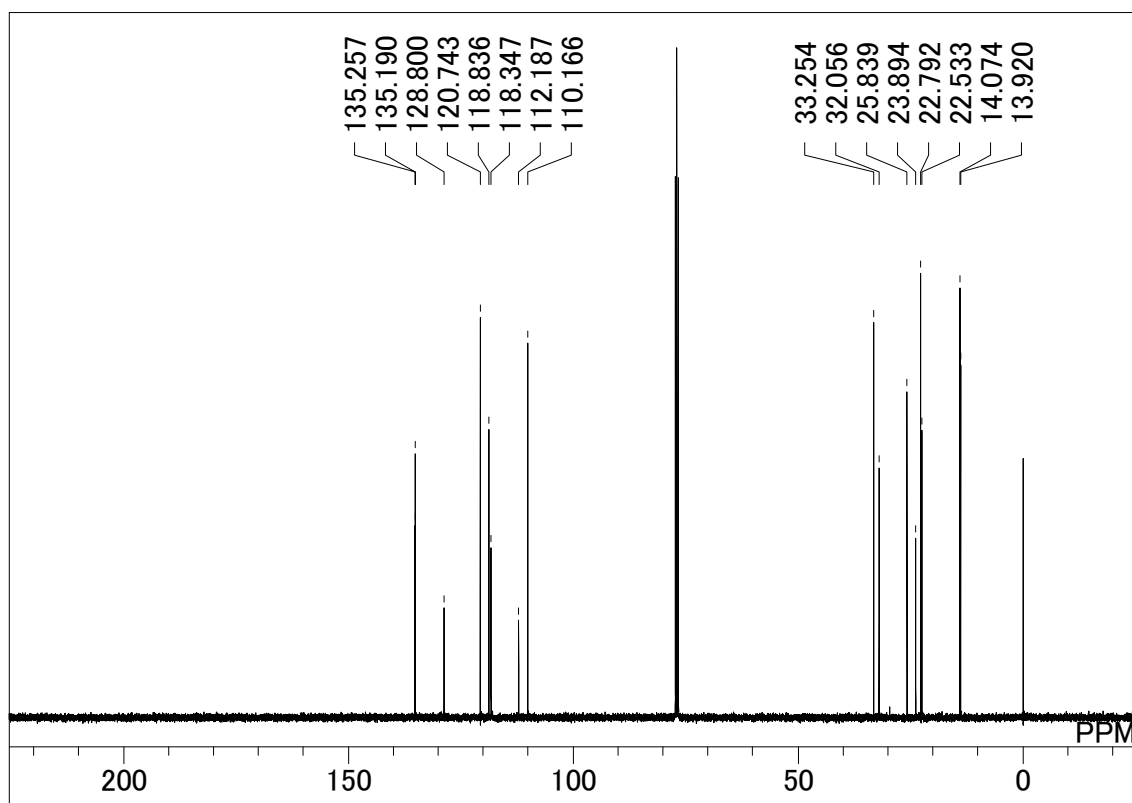

Entry 6

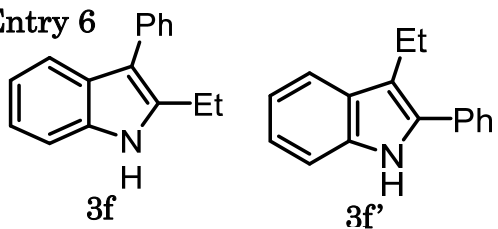

3f : 3f' = 4 : 1

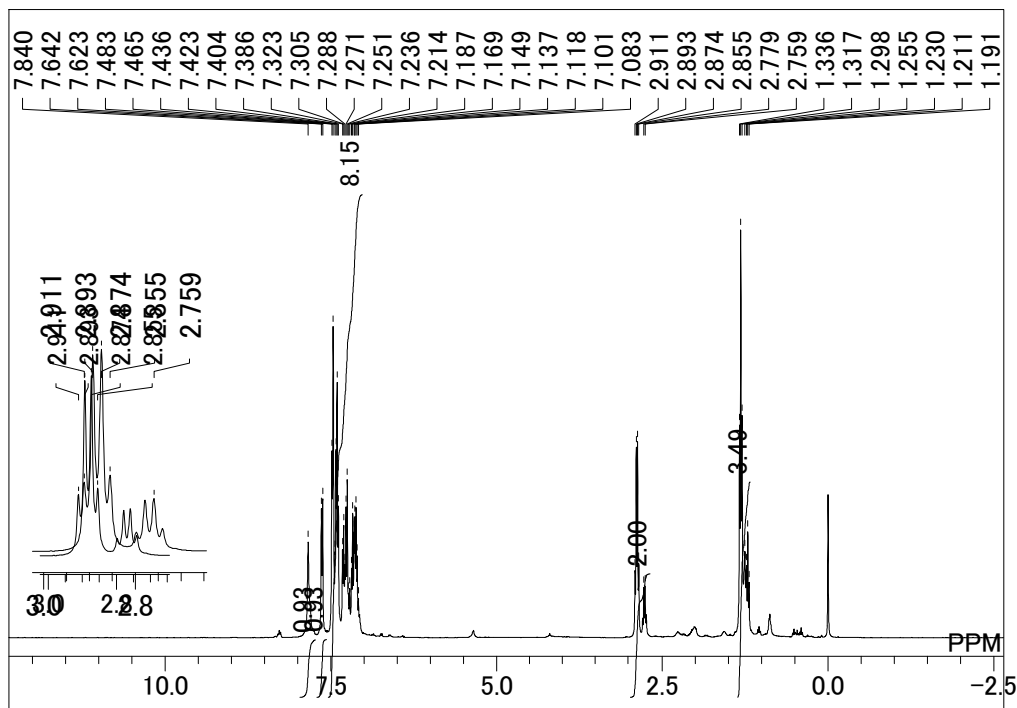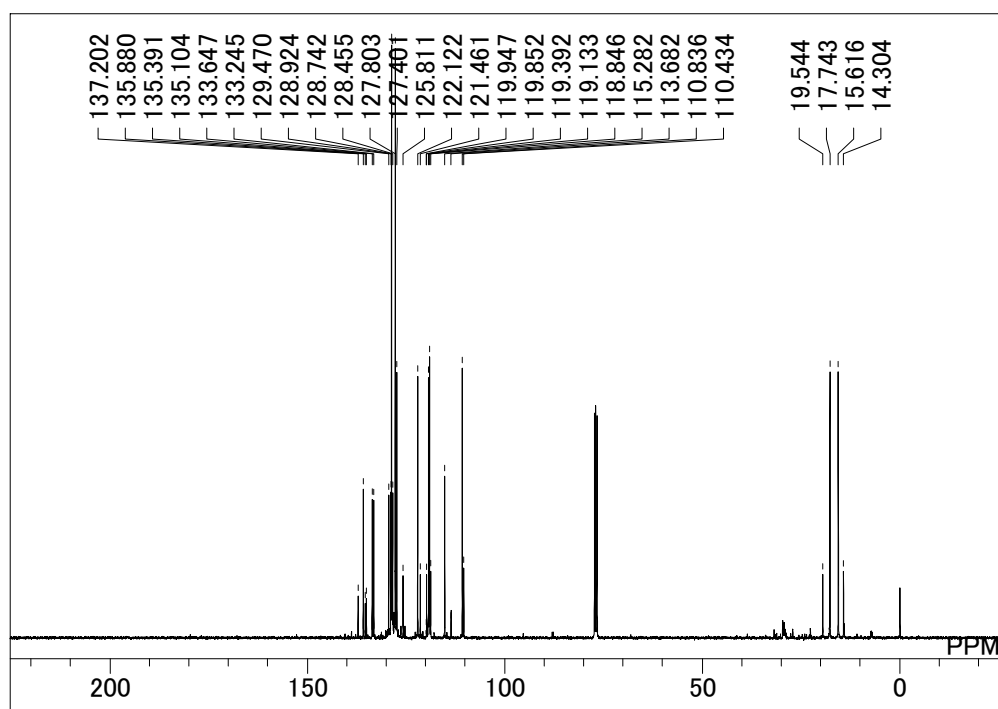

Entry 9

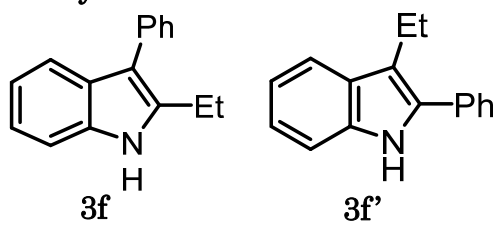

$3f : 3f' = 2 : 1$

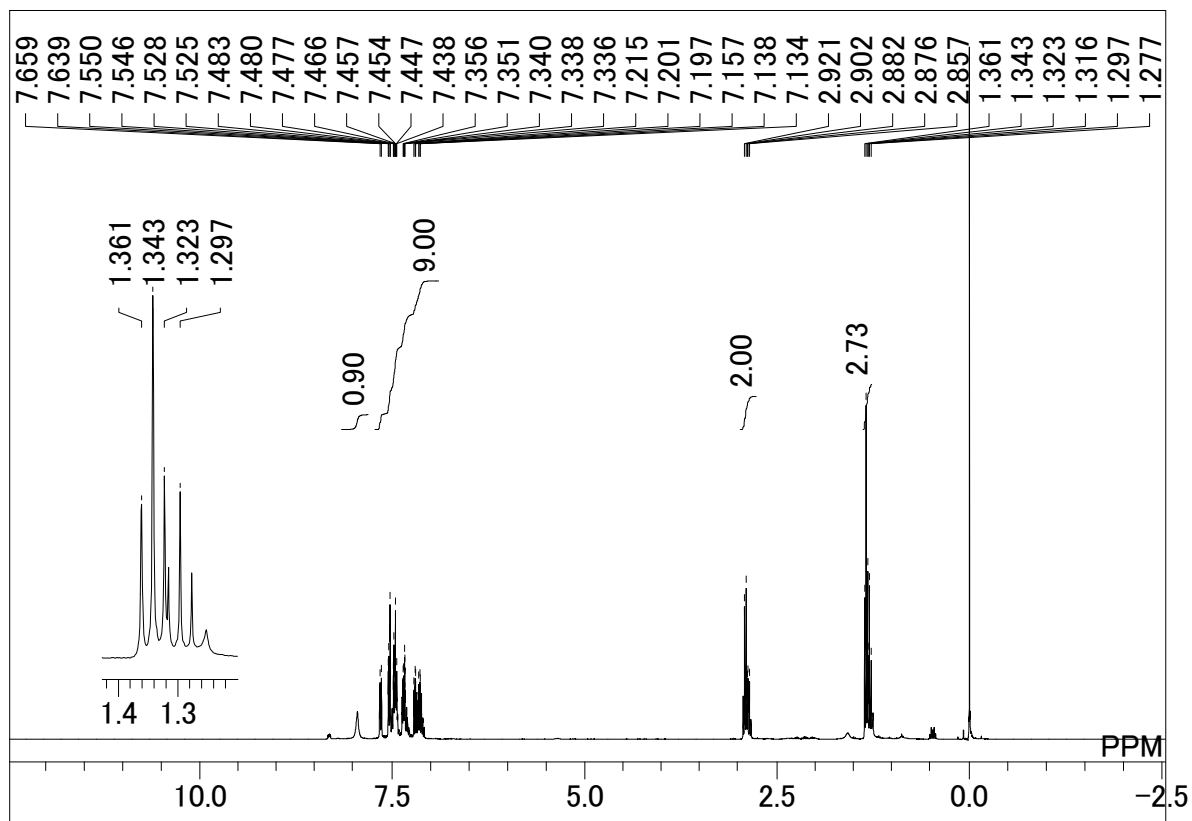

3g

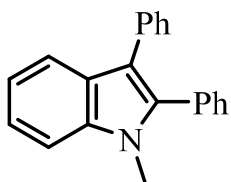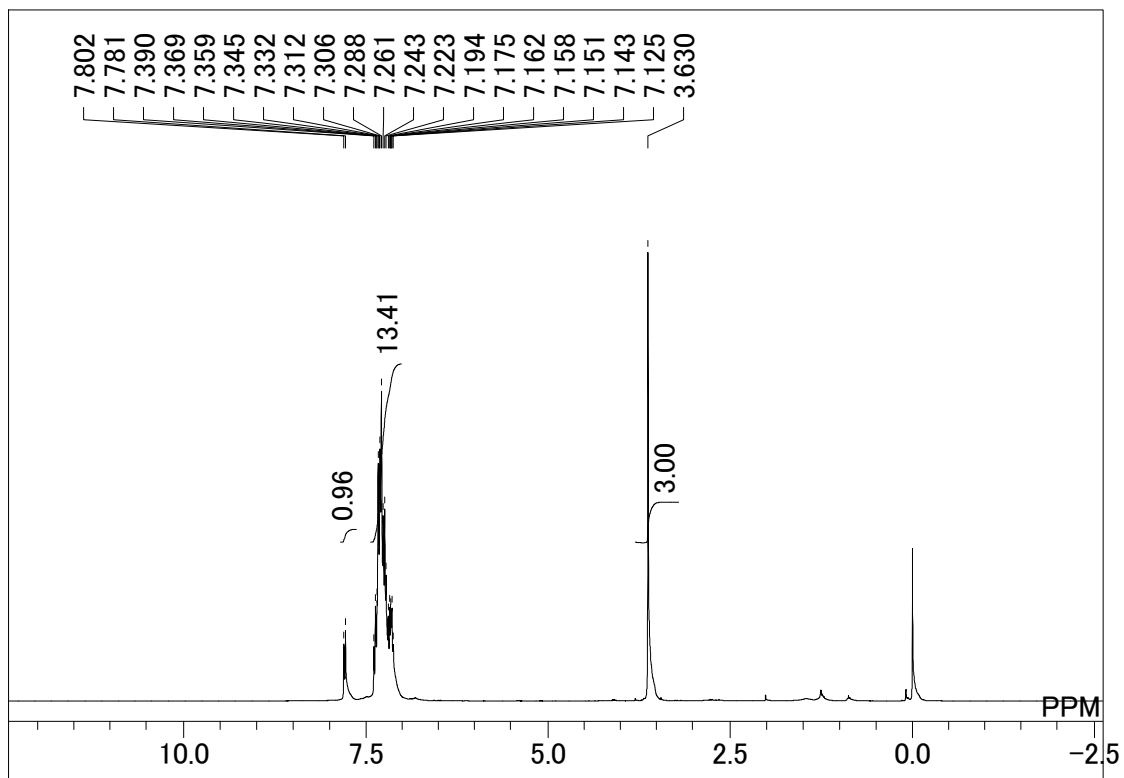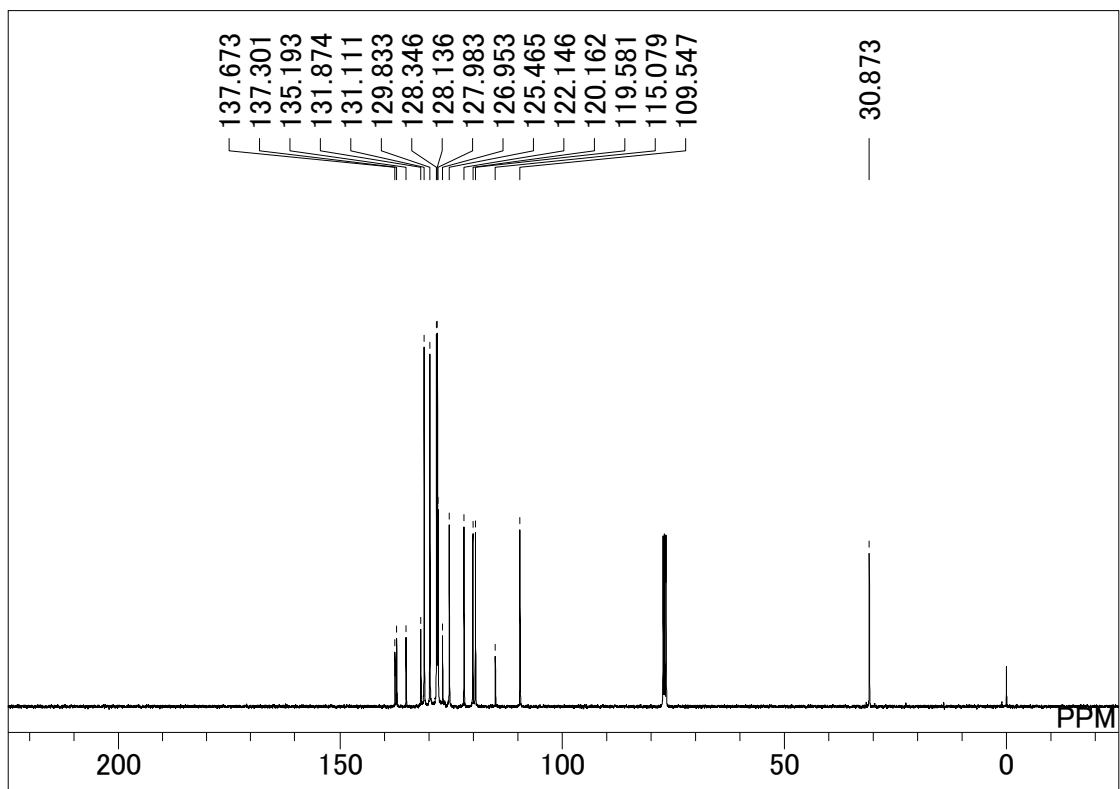

Supplement: c8ra01410h1.pdf [file c8ra01410h1.pdf]
